# Supplementary material
Source: MDPI journal article supplement (https://www.mdpi.com/2077-1312/11/1/78)
Supplement: s1 [file s1]

**Supplementary Data Table S1:** Summary of the number of occurrences of the main keywords during the article screening that relates to mitigation strategies of seaweed aquaculture in ocean acidification scenarios. To specify the search scope, the term "management" was accounted for but this term was further contextualised to be within the scope of the other identified keywords. "Management" was therefore not used as a keyword. M: Management; F: Framework; R: Regulation; A: Assessment; P: Policy; I: IMTA; MO: Monitoring; E: Evaluation; SS: Site selection; SB: Site buffering; SE: Selective breeding; GI: Genetic improvement; O: Cultivation/culture techniques/practices.

| Reference                               | Keywords |    |    |    |     |    |    |    |    |    |    |    |    |
|-----------------------------------------|----------|----|----|----|-----|----|----|----|----|----|----|----|----|
|                                         | M        | F  | R  | A  | P   | I  | MO | E  | SS | SB | SE | GI | O  |
| Clements & Chopin (2016) [53]           | 2        | 0  | 0  | 0  | 0   | 22 | 19 | 0  | 3  | 8  | 7  | 0  | 1  |
| Stévant, et al. (2017) [54]             | 5        | 8  | 1  | 6  | 0   | 20 | 1  | 1  | 0  | 0  | 2  | 0  | 0  |
| Buchholz, et al. (2012) [133]           | 0        | 0  | 0  | 1  | 3   | 20 | 0  | 2  | 2  | 0  | 0  | 0  | 13 |
| Buck, et al. (2004) [128]               | 58       | 23 | 36 | 10 | 10  | 0  | 6  | 1  | 0  | 0  | 0  | 0  | 3  |
| Radulovich, et al. (2015) [13]          | 3        | 1  | 2  | 0  | 2   | 2  | 2  | 3  | 5  | 0  | 2  | 6  | 23 |
| FAO (2020) [14]                         | 271      | 72 | 34 | 53 | 134 | 0  | 73 | 5  | 2  | 0  | 1  | 2  | 1  |
| Troell, et al. (2009) [132]             | 4        | 0  | 5  | 0  | 0   | 66 | 1  | 0  | 1  | 0  | 0  | 0  | 2  |
| UN Office of Legal Affairs. (2021) [56] | 354      | 75 | 20 | 13 | 45  | 0  | 87 | 31 | 0  | 1  | 0  | 0  | 0  |
| Abreu, et al. (2011) [131]              | 3        | 1  | 1  | 1  | 0   | 38 | 4  | 5  | 0  | 0  | 0  | 0  | 0  |
| Ahmed, et al. (2019) [130]              | 6        | 2  | 0  | 0  | 0   | 11 | 0  | 0  | 0  | 0  | 0  | 0  | 0  |
| Al-Janabi, et al. (2021) [156]          | 0        | 0  | 0  | 0  | 0   | 0  | 1  | 0  | 0  | 4  | 0  | 0  | 0  |
| Anyanwu, et al. (2015) [129]            | 1        | 0  | 0  | 1  | 1   | 0  | 0  | 1  | 0  | 0  | 0  | 0  | 0  |
| Bixler, et al. (2011) [18]              | 4        | 0  | 0  | 0  | 0   | 1  | 0  | 0  | 0  | 0  | 0  | 0  | 0  |
| Bregnballe, et al. (2015) [50]          | 20       | 0  | 0  | 0  | 2   | 0  | 11 | 0  | 3  | 3  | 0  | 2  | 0  |
| Broch, et al. (2019) [17]               | 3        | 0  | 0  | 0  | 0   | 2  | 3  | 6  | 0  | 0  | 0  | 0  | 0  |
| Callaway, et al. (2012) [34]            | 3        | 0  | 1  | 2  | 1   | 1  | 6  | 0  | 0  | 0  | 2  | 1  | 2  |
| Chopin, et al. (2001) [16]              | 11       | 4  | 3  | 0  | 2   | 5  | 2  | 0  | 3  | 1  | 4  | 0  | 1  |
| Chopin & Sawhney (2009) [10]            | 4        | 0  | 1  | 0  | 0   | 15 | 0  | 0  | 0  | 0  | 1  | 0  | 5  |
| Chopin, et al. (1999) [88]              | 0        | 0  | 0  | 0  | 0   | 0  | 1  | 0  | 1  | 0  | 0  | 0  | 0  |
| Chopin & Tacon (2021) [11]              | 1        | 1  | 0  | 0  | 0   | 6  | 0  | 0  | 0  | 0  | 0  | 0  | 1  |
| Chung, et al. (2017) [4]                | 1        | 1  | 0  | 0  | 0   | 1  | 0  | 1  | 1  | 0  | 2  | 0  | 1  |
| Duarte, et al. (2017) [3]               | 0        | 1  | 0  | 2  | 1   | 0  | 0  | 1  | 0  | 1  | 0  | 0  | 1  |

|                                    |    |   |   |   |   |   |    |   |   |   |   |   |    |
|------------------------------------|----|---|---|---|---|---|----|---|---|---|---|---|----|
| Friedlander (2007) [123]           | 0  | 0 | 0 | 0 | 0 | 0 | 0  | 0 | 0 | 0 | 1 | 1 | 1  |
| Froehlich, et al. (2019) [8]       | 1  | 1 | 0 | 1 | 9 | 1 | 0  | 1 | 1 | 1 | 0 | 0 | 4  |
| Gordillo, et al. (2016) [57]       | 0  | 0 | 0 | 0 | 0 | 0 | 0  | 1 | 0 | 0 | 0 | 0 | 0  |
| Hafting, et al. (2015) [134]       | 5  | 0 | 2 | 0 | 0 | 0 | 0  | 0 | 4 | 0 | 2 | 3 | 8  |
| Harley, et al. 2012 [20]           | 4  | 3 | 0 | 0 | 0 | 0 | 0  | 0 | 0 | 0 | 0 | 0 | 0  |
| Hoegh-Guldberg, et al. (2019) [35] | 0  | 2 | 0 | 0 | 1 | 0 | 0  | 0 | 0 | 0 | 0 | 0 | 0  |
| Kang & Chung (2018) [62]           | 0  | 0 | 0 | 0 | 0 | 3 | 0  | 0 | 0 | 0 | 0 | 0 | 0  |
| Kim, et al. (2017) [136]           | 2  | 0 | 0 | 0 | 0 | 4 | 1  | 0 | 3 | 0 | 3 | 2 | 5  |
| Krause-Jensen, et al. (2018) [145] | 9  | 4 | 1 | 6 | 4 | 0 | 0  | 1 | 0 | 0 | 0 | 0 | 0  |
| San (2012) [25]                    | 10 | 0 | 0 | 2 | 1 | 5 | 5  | 0 | 1 | 0 | 0 | 0 | 17 |
| Sondak, et al. (2017) [7]          | 0  | 0 | 0 | 0 | 1 | 1 | 0  | 0 | 0 | 0 | 0 | 0 | 0  |
| Xiao, et al. (2021) [135]          | 0  | 0 | 0 | 0 | 0 | 0 | 30 | 1 | 1 | 3 | 0 | 0 | 0  |
| Xu, et al. (2017) [74]             | 1  | 0 | 0 | 0 | 0 | 0 | 0  | 1 | 0 | 1 | 0 | 0 | 0  |
